# Supplementary material
Source: HighWire-hosted journal article supplement (https://www.jneurosci.org/highwire/filestream/600446/field_highwire_adjunct_files/0/Supplemental_Figure.pdf)

**A**

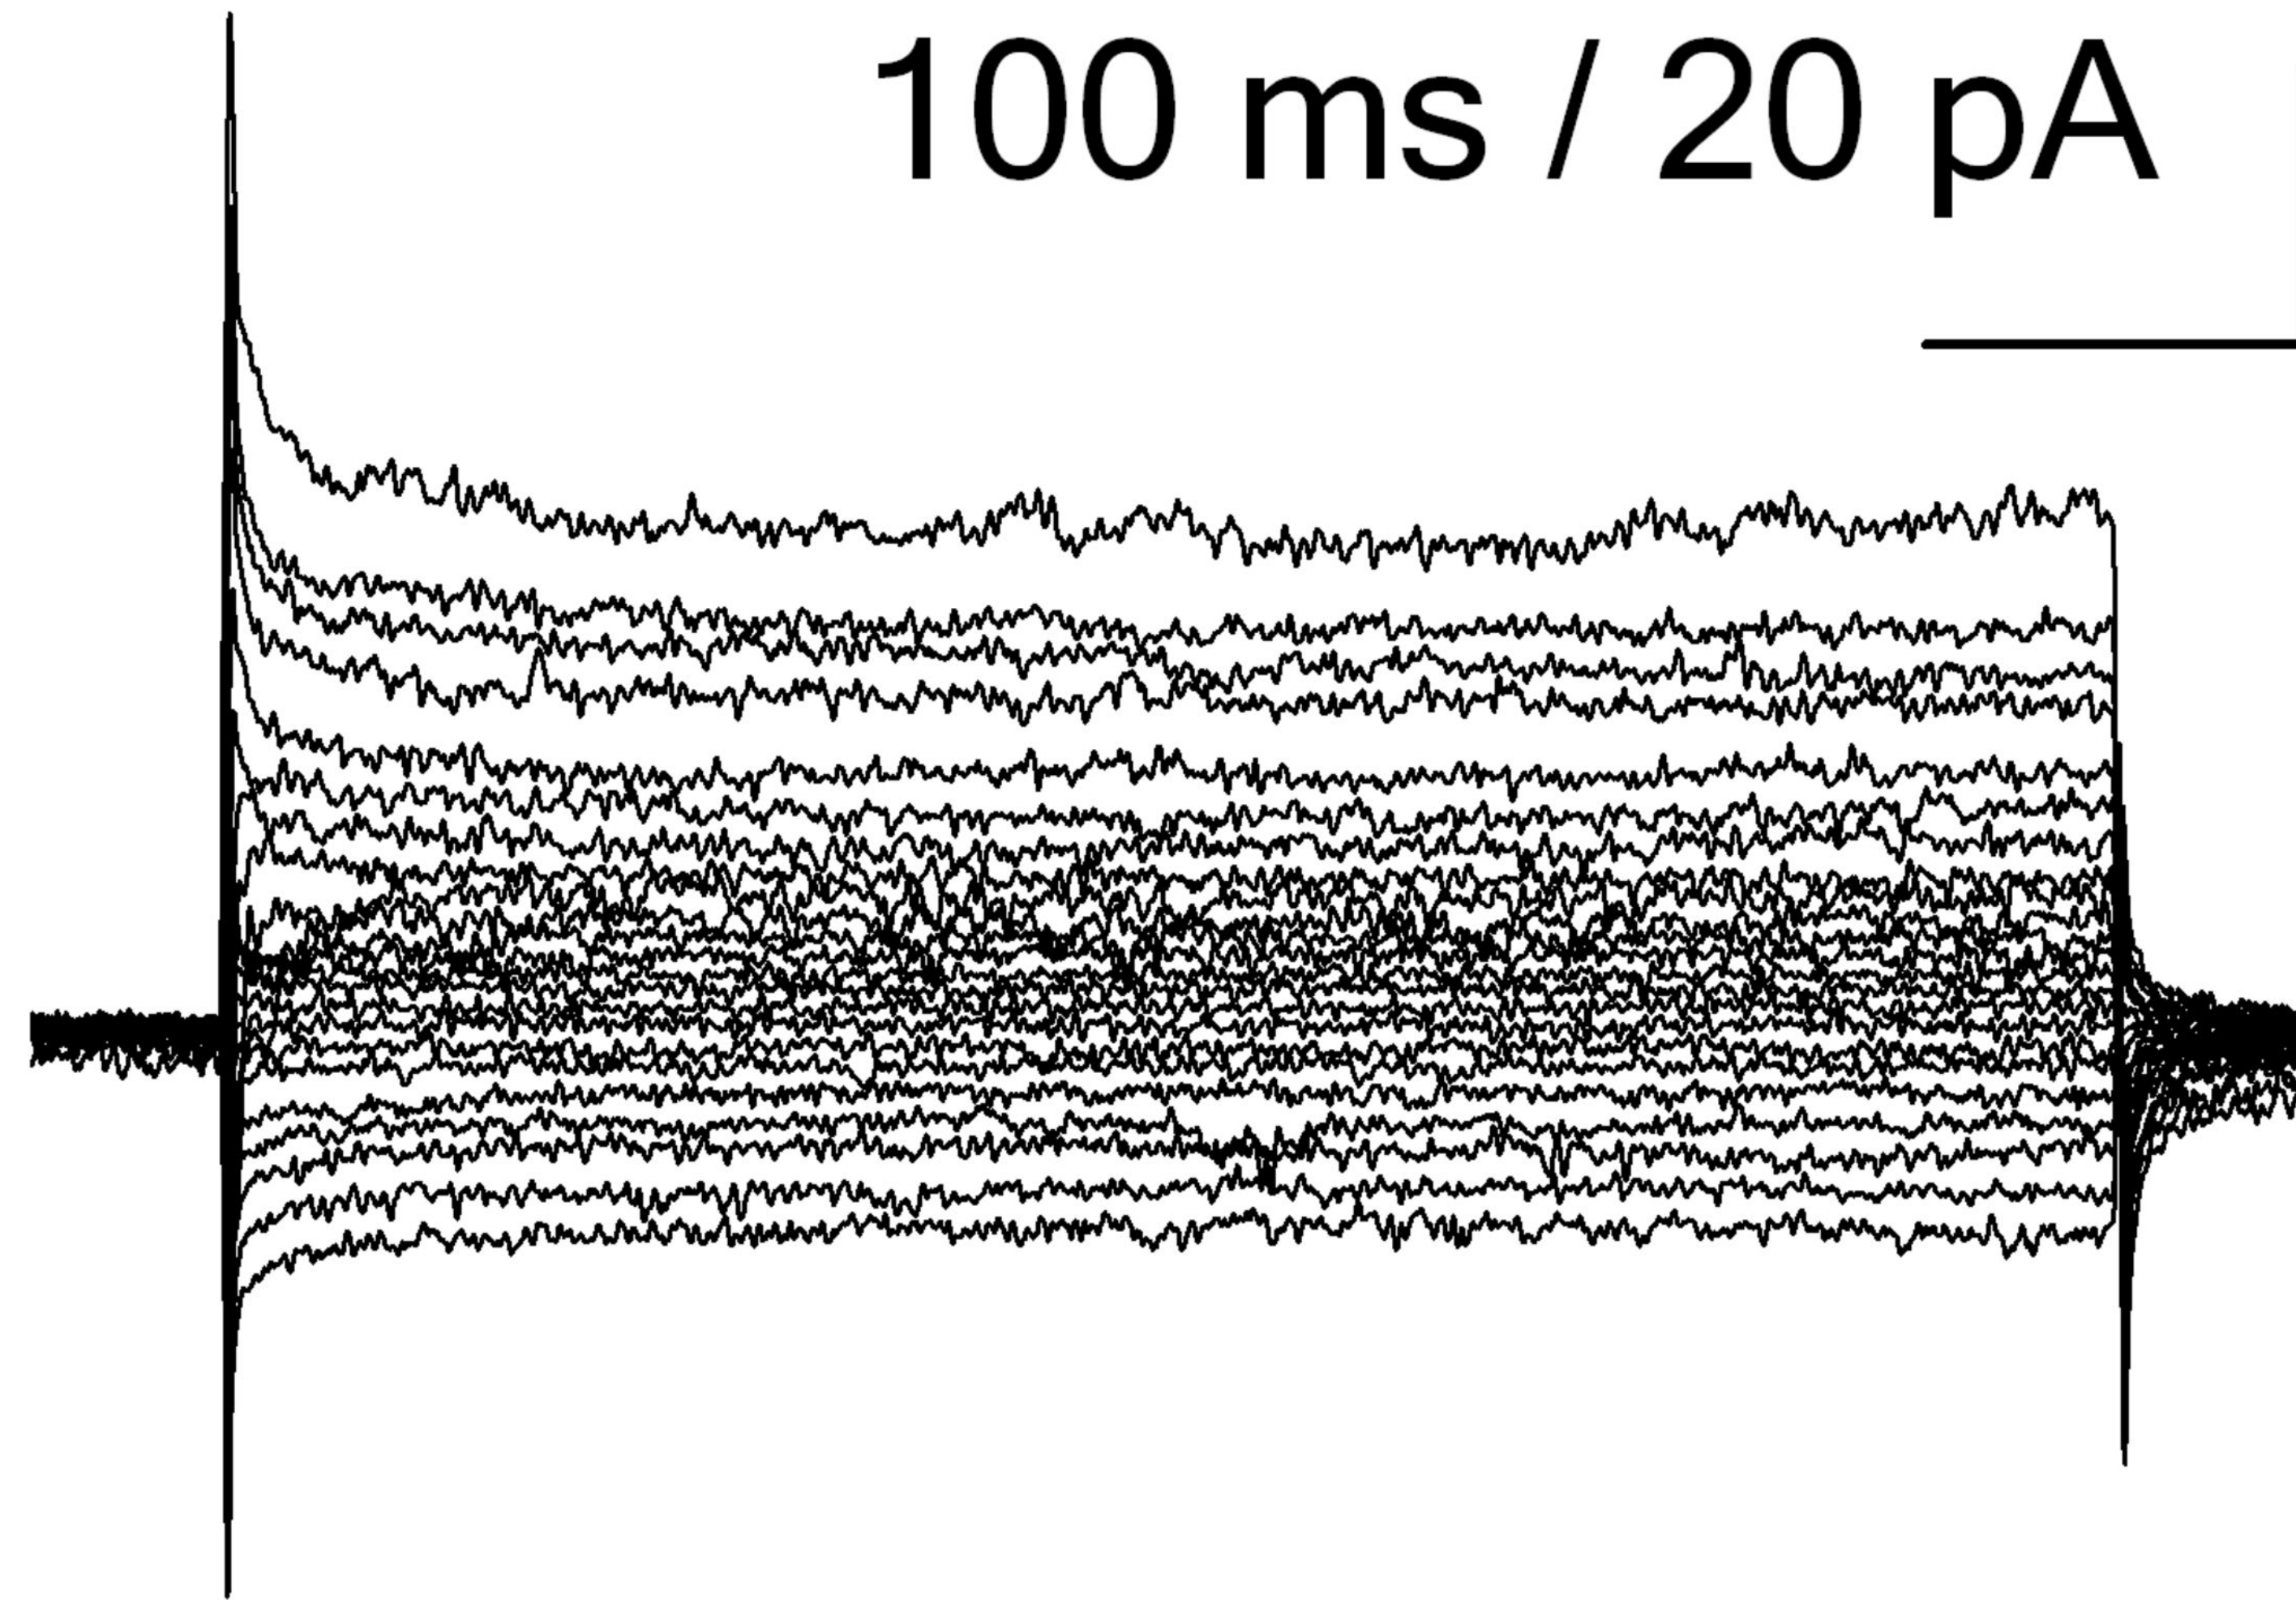

**B**

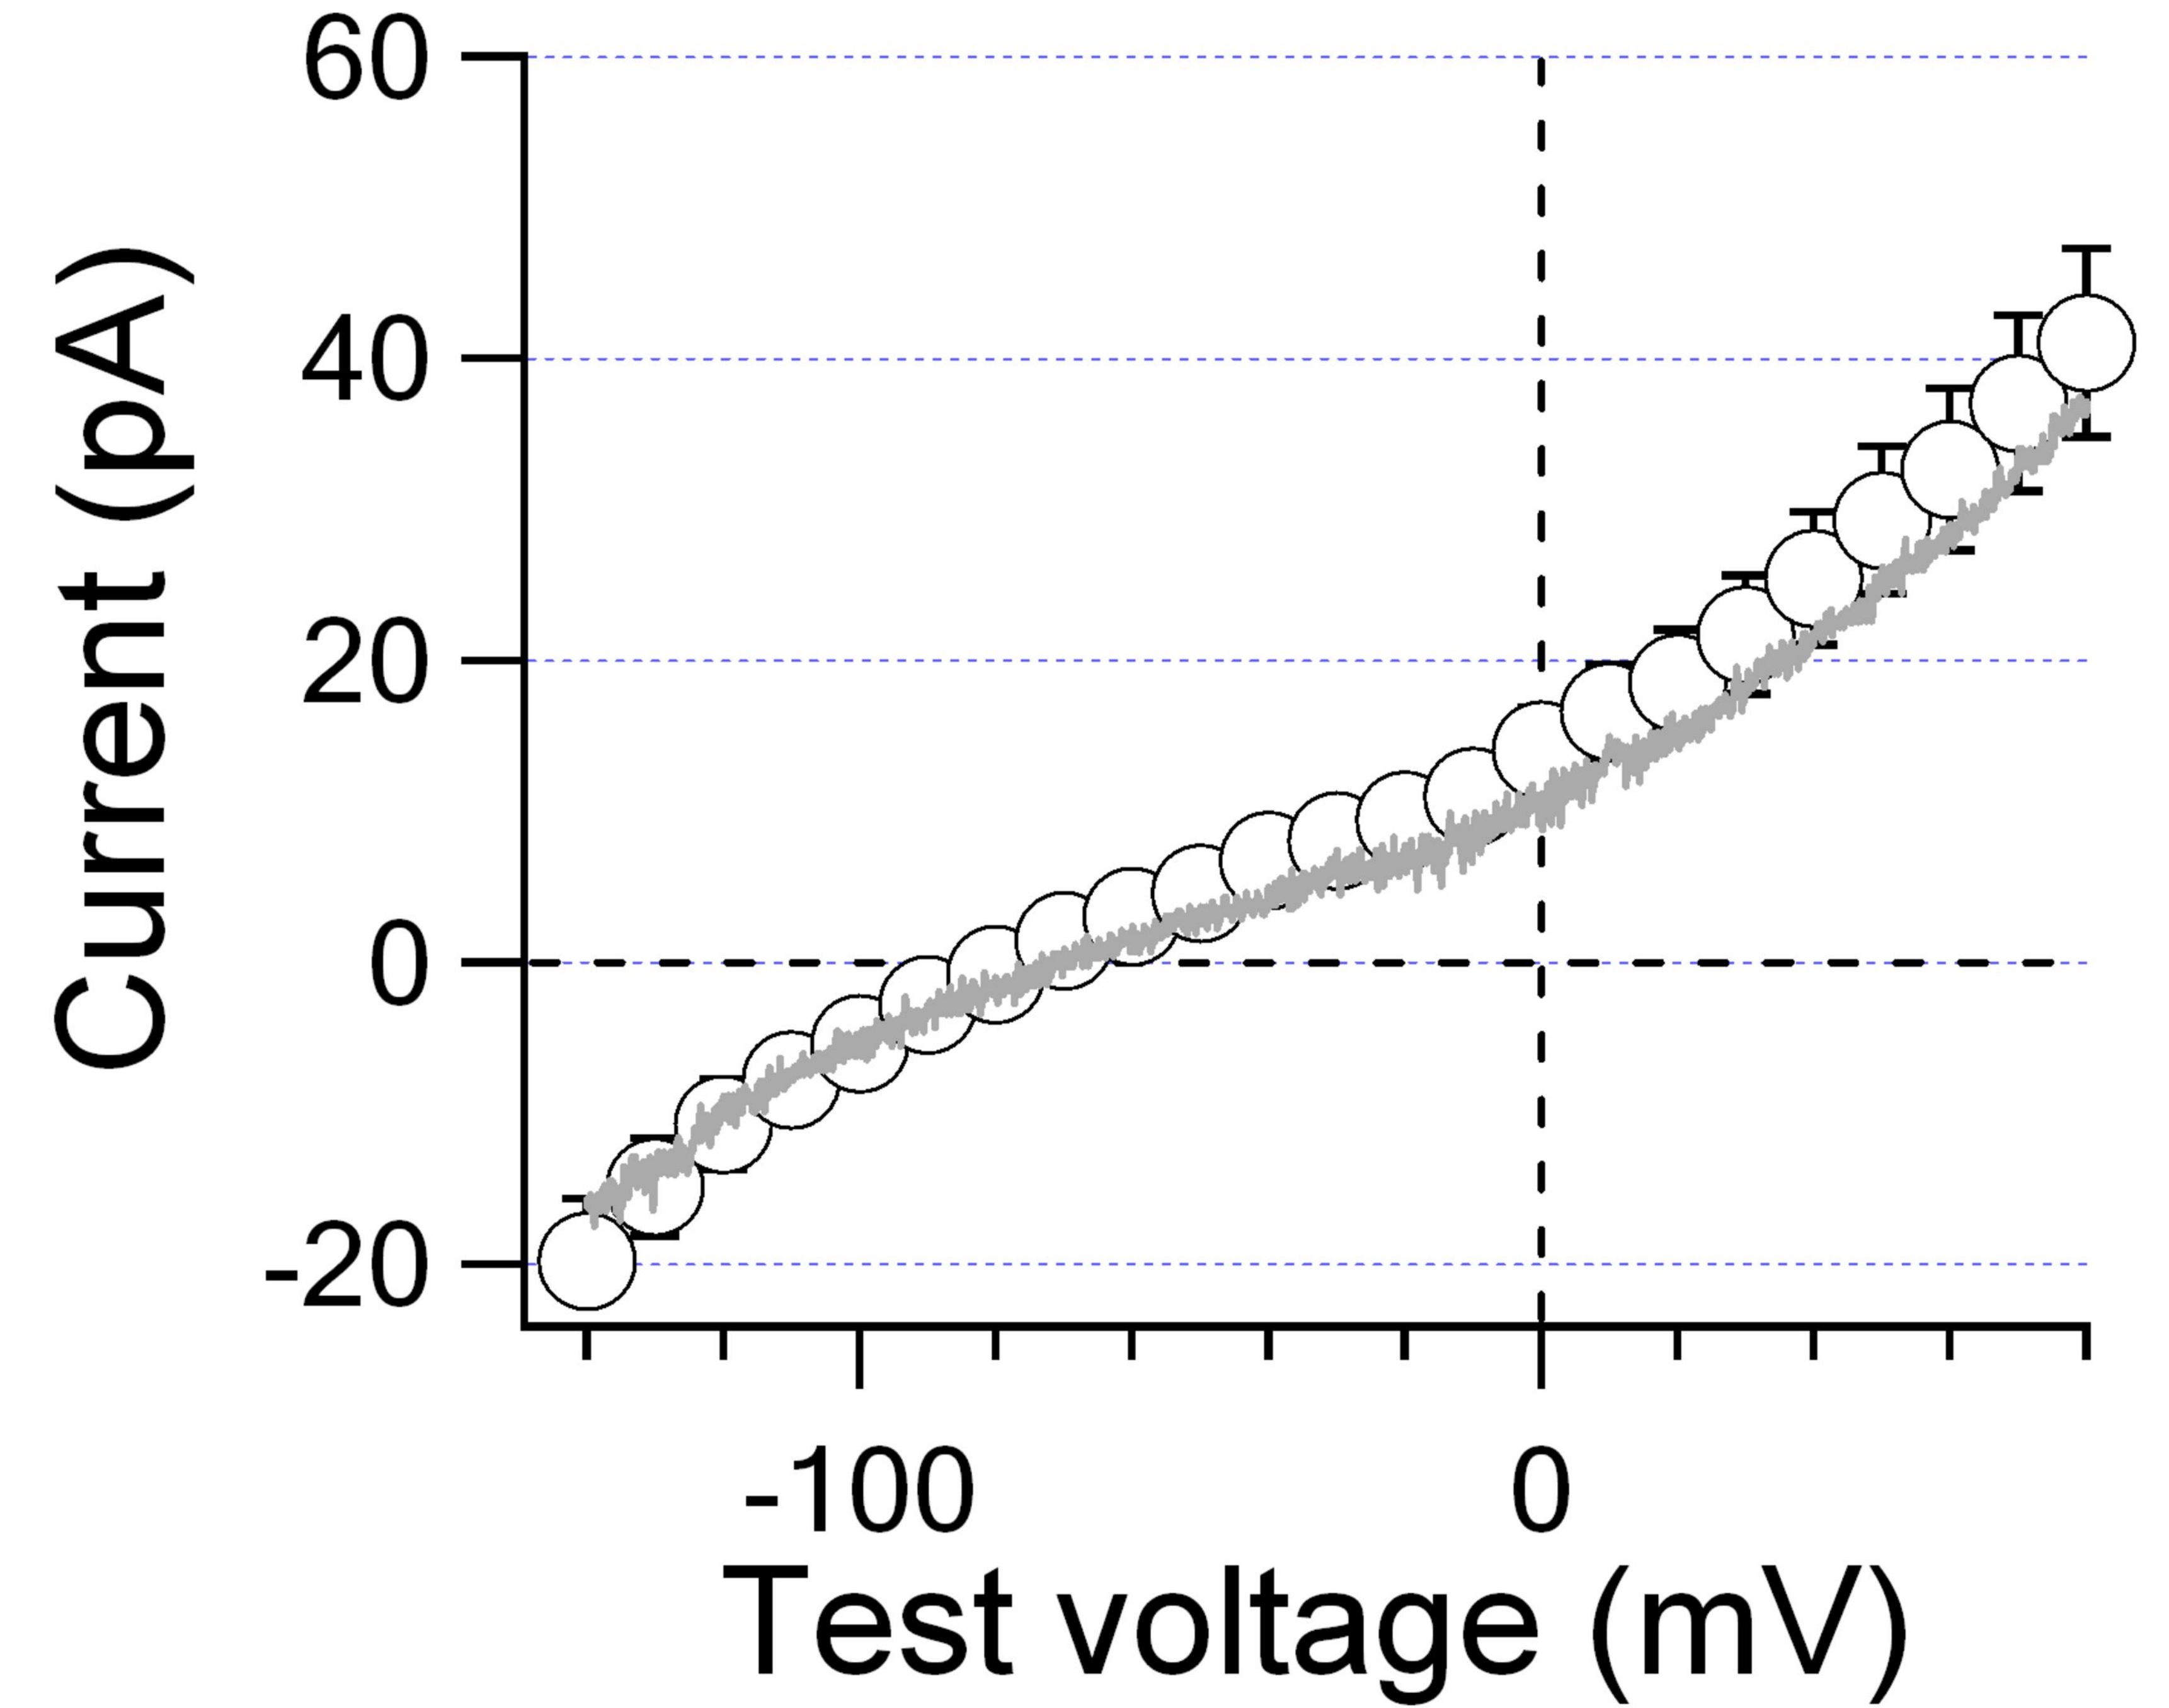

Untransfected CHO cells or transfected CHO cells with GFP

Supplement: Supplemental_Figure.pdf [file Supplemental_Figure.pdf]
